# Supplementary material for: Homeostasis of branched-chain amino acids is critical for the activity of TOR signaling in Arabidopsis
Source: eLife journal article supplement (doi:10.7554/elife.50747), 2019-12-06
Supplement: supp [file elife_poa_e50747_Figure_2_source_data_1.xlsx]

## Sheet: Sheet1
		Figure 2—source data 1. The BCAA biosynthesis pathway is up-regulated in young seedlings of eva1 and IPMS1 loss-of-function mutants.
				Ile	Ileu	Val	Val	Leu	Leu	Thr	Thr	Leu/(Val+Leu)	BCAA	BCAA	BCAA/FAAc
		Stage	Genotype	(nmol/mg FWa)	(FCb)	(nmol/mg FW)	(FC)	(nmol/mg FW)	(FC)	(nmol/mg FW)	(FC)	(ratio × 100)	(nmol/mg FW)	(FC)	(ratio × 100)
		10-day old	WT	0.029 ± 0.0012		0.12 ± 0.003		0.035 ± 0.0013		0.55 ± 0.033		22 ± 0.43	0.19 ± 0.0054		0.64 ± 0.05
			eva1	0.052 ± 0.0021***	1.76	0.97 ± 0.040***	7.9	0.024 ± 0.0032**	0.66	0.82 ± 0.044***	1.51	2.3 ± 0.22***	1.05 ± 0.044***	5.58	1.8 ± 0.14***
			ipms1-4	0.047 ± 0.0013***	1.62	0.64 ± 0.024***	5.29	0.027 ± 0.0016**	0.77	0.81 ± 0.025***	1.48	4.0 ± 0.20***	0.73 ± 0.026***	3.87	1.5 ± 0.07***
			ipms1-5	0.044 ± 0.00055***	1.5	0.70 ± 0.016***	5.7	0.016 ± 0.00071***	0.46	0.76 ± 0.023***	1.4	2.3 ± 0.13***	0.76 ± 0.016***	4.06	1.4 ± 0.07***
		20-day old	WT	0.026 ± 0.00067		0.087 ± 0.0048		0.020 ± 0.0014		0.34 ± 0.013		19 ± 0.48	0.13 ± 0.0063		0.77 ± 0.04
			eva1	0.028 ± 0.0020	1.05	0.24 ± 0.016***	2.74	0.012 ± 0.0014**	0.58	0.29 ± 0.017*	0.85	4.6 ± 0.36**	0.28 ± 0.019***	2.21	1.9 ± 0.08***
			ipms1-4	0.041 ± 0.0060	1.55	0.26 ± 0.022***	3.02	0.020 ± 0.0038	0.97	0.35 ± 0.021	1.03	6.0 ± 1.5*	0.32 ± 0.026***	2.55	1.9 ± 0.14***
			ipms1-5	0.040 ± 0.0019***	1.51	0.29 ± 0.025***	3.3	0.021 ± 0.0017	1.02	0.45 ± 0.033*	1.31	6.8 ± 0.75*	0.35 ± 0.026***	2.77	2.1 ± 0.04***
		Amino acids were extracted from aerial tissues of 10 days old seedlings and rosette leaves of 20 days old plants. Each value represents the mean ± SEM. The asterisks indicate significant difference compared to the GFP-δTIP as wild type (WT) (*p ≤ 0.05, **p ≤ 0.01, ***p ≤ 0.001, unpaired t test). aFW, fresh weight; bFC, fold change compared to GFP-δTIP; cFAA, total 19 free amino acids without cyst…
