# Supplementary material for: Homeostasis of branched-chain amino acids is critical for the activity of TOR signaling in Arabidopsis
Source: eLife. 2019 Dec 6;8:e50747. doi: 10.7554/eLife.50747 (PMC6937141; doi:10.7554/eLife.50747)
Supplement: Supplementary file 1. [file elife-50747-supp1.xlsx]

## Sheet: Sheet1
Supplementary file 1. LC gradient used for amino acid separation
Time (minutes)	% Solvent A	% Solvent B
0	100	0
1.75	100	0
8	25	75
8.01	10	90
9	10	90
9.01	100	0
13	100	0
