# Supplementary material for: Homeostasis of branched-chain amino acids is critical for the activity of TOR signaling in Arabidopsis
Source: eLife. 2019 Dec 6;8:e50747. doi: 10.7554/eLife.50747 (PMC6937141; doi:10.7554/eLife.50747)
Supplement: Supplementary file 2. [file elife-50747-supp2.xlsx]

## Sheet: Sheet1
Sequence name	Nucleotide sequence	Description
ipms1-4_LP	TTTCAATAAGCGATGACCCAC	Genotyping of ipms1-4 (SALK_101771)
ipms1-4_RP	ATGGAATGCTGAAACACAAGG	Genotyping of ipms1-4 (SALK_101771)
ipms1-5_LP	GTGCCTAACGGTCCTCTTTTC	Genotyping of ipms1-5 (WiscDsLoxHs221_05F)
ipms1-5_RP	CCAGTTCCAATAGAACAAGCG	Genotyping of ipms1-5 (WiscDsLoxHs221_05F)
ahass1-1_LP	TAAGGTCGTCAACAACCGAAC	Genotyping of ahass1-1 (SALK_096207)
ahass1-1_RP	CAGAAGTCTGAAACCCACAGG	Genotyping of ahass1-1 (SALK_096207)
ahass2-7_LP	AAGTCTCTCCAGGATTCGCTC	Genotyping of ahass2-7 (WiscDsLoxHs009_02G)
ahass2-7_RP	TCTTTTTCTCACCCCACATTG	Genotyping of ahass2-7 (WiscDsLoxHs009_02G)
raptor1b_LP	CAATATGAAGCTGCGGCTAAC	Genotyping of raptor1b (SALK_022096)
raptor1b_RP	CATCGGATCAAGTTGCTTACC	Genotyping of raptor1b (SALK_022096)
LBb1.3	ATTTTGCCGATTTCGGAAC	Genotyping of SALK lines
LB4	TGATCCATGTAGATTTCCCGGACATGAAG	Genotyping of WiscDsLoxHs lines
IPMS1_F1	TGCTCAATCTCAGATCCTTCTC	Amplification of the coding sequence of IPMS1 catalytic domain
IPMS1_R1	CTAATACATGATCTCCACGGCA	Amplification of the coding sequence of IPMS1 catalytic domain
IPMS1_F2	GGCTATTGTAGGAGCGAATG	Amplification of the coding sequence of IPMS1 allosteric domain
IPMS1_R2	CTCTTTTGACATGCAACTTCG	Amplification of the coding sequence of IPMS1 allosteric domain
AHASS2_F	TCCGTTTTGGAGATTTTCAG	Amplification of the coding sequence of AHASS2 ACT2 domain
AHASS2_R	GAGACATCAATGGCTTTAGCAC	Amplification of the coding sequence of AHASS2 ACT2 domain
OMR1_F	GGACGTGAATGTCGTAGCC	Amplification of the coding sequence of OMR1 ACT2 domain
OMR1_R	ACGCTCATCCGACAGACAC	Amplification of the coding sequence of OMR1 ACT2 domain
